# Supplementary material for: The KNIME based classification models for yellow fever virus inhibition
Source: Royal Society of Chemistry journal article supplement (doi:10.1039/c4ra15317k), 2015-01-01

**Table S1: Details of the statistical parameters calculated for the constructed models**

| Construct ed total Models | Dataset   | Activity Threshold | No. of Compounds | Tranin g | Tes t | Confusion Matrix |     |     |     |          |         | Sensitivi ty | Specifici ty | RO C | G-me an | F-measu re | MC C | Accura cy |        |
|---------------------------|-----------|--------------------|------------------|----------|-------|------------------|-----|-----|-----|----------|---------|--------------|--------------|------|---------|------------|------|-----------|--------|
|                           |           |                    |                  |          |       | T P              | F N | T N | F P | Tota l P | Total N |              |              |      |         |            |      |           | Tot al |
| Model 1                   | Dataset-1 | < 10 and >10       | 70               | 45       | 25    | 0                | 2   | 23  | 0   | 23       | 2       | 25           | 1.00         | 0.00 | 0.52    | 0.00       | 0.96 | 0.00      | 0.92   |
| Model 2                   |           | < 30 and >30       | 70               | 45       | 25    | 6                | 1   | 16  | 2   | 18       | 7       | 25           | 0.89         | 0.86 | 0.86    | 0.87       | 0.91 | 0.72      | 0.88   |
| Model 3                   |           | < 50 and >50       | 70               | 45       | 25    | 10               | 0   | 14  | 1   | 15       | 10      | 25           | 0.93         | 1.00 | 1.00    | 0.97       | 0.96 | 0.92      | 0.96   |
| Model 4                   |           | < 100 and >100     | 70               | 45       | 25    | 13               | 0   | 11  | 1   | 12       | 13      | 25           | 0.917        | 1.00 | 0.93    | 0.96       | 0.96 | 0.92      | 0.96   |
| Model 5                   | Dataset-2 | < 10 and >10       | 39               | 25       | 14    | 0                | 1   | 13  | 0   | 13       | 1       | 14           | 1.00         | 0.00 | 0.54    | 0.00       | 0.96 | 0.00      | 0.93   |
| Model 6                   |           | < 30 and >30       | 39               | 25       | 14    | 10               | 2   | 1   | 1   | 2        | 12      | 14           | 0.50         | 0.83 | 0.91    | 0.64       | 0.40 | 0.28      | 0.78   |
| Model 7                   |           | < 50 and >50       | 39               | 25       | 14    | 5                | 0   | 8   | 1   | 9        | 5       | 14           | 0.89         | 1.00 | 0.88    | 0.94       | 0.94 | 0.86      | 0.93   |
| Model 8                   |           | < 100 and >100     | 39               | 25       | 14    | 0                | 0   | 14  | 0   | 14       | 0       | 14           | 1.00         | 0.00 | non e   | 0.00       | 1.00 | 0.00      | 1.00   |
| Model 9                   | Dataset-3 | < 10 and >10       | 65               | 42       | 23    | 0                | 0   | 23  | 0   | 23       | 0       | 23           | 1.00         | 0.00 | non e   | 0.00       | 1.00 | 0.00      | 1.00   |
| Model 10                  |           | < 30 and >30       | 65               | 42       | 23    | 1                | 0   | 22  | 0   | 22       | 1       | 23           | 1.00         | 1.00 | 0.52    | 1.00       | 1.00 | 1.00      | 1.00   |
| Model 11                  |           | < 50 and >50       | 65               | 42       | 23    | 1                | 1   | 19  | 2   | 21       | 2       | 23           | 0.90         | 0.50 | 0.92    | 0.67       | 0.93 | 0.34      | 0.87   |
| Model 12                  |           | < 100 and >100     | 65               | 42       | 23    | 6                | 0   | 17  | 0   | 17       | 6       | 23           | 1.00         | 1.00 | 0.92    | 1.00       | 1.00 | 1.00      | 1.00   |
| Model 13                  | Dataset-4 | < 10 and >10       | 85               | 45       | 40    | 1                | 0   | 19  | 5   | 24       | 1       | 25           | 0.79         | 1.00 | 0.50    | 0.89       | 0.88 | 0.36      | 0.80   |
| Model 14                  |           | < 30 and >30       | 85               | 45       | 40    | 4                | 1   | 19  | 1   | 20       | 5       | 25           | 0.95         | 0.80 | 0.52    | 0.87       | 0.95 | 0.75      | 0.92   |
| Model 15                  |           | < 50 and >50       | 85               | 45       | 40    | 10               | 0   | 10  | 5   | 15       | 10      | 25           | 0.67         | 1.00 | 0.92    | 0.82       | 0.80 | 0.67      | 0.80   |

|          |           |                |     |     |         |        |    |         |   |     |    |     |      |      |          |      |      |      |      |
|----------|-----------|----------------|-----|-----|---------|--------|----|---------|---|-----|----|-----|------|------|----------|------|------|------|------|
| Model 16 |           | < 100 and >100 | 85  | 45  | 40      | 1<br>7 | 0  | 1       | 7 | 8   | 17 | 25  | 0.12 | 1.00 | 0.6<br>2 | 0.35 | 0.22 | 0.30 | 0.72 |
| Model 17 | Dataset-5 | < 10 and >10   | 64  | 41  | 23      | 1      | 0  | 20      | 2 | 22  | 1  | 23  | 0.91 | 1.00 | 0.5<br>2 | 0.95 | 0.95 | 0.55 | 0.91 |
| Model 18 |           | < 30 and >30   | 64  | 41  | 23      | 4      | 0  | 18      | 1 | 19  | 4  | 23  | 0.95 | 1.00 | 0.8<br>8 | 0.97 | 0.97 | 0.87 | 0.96 |
| Model 19 |           | < 50 and >50   | 64  | 41  | 23      | 6      | 0  | 16      | 1 | 17  | 6  | 23  | 0.94 | 1.00 | 0.8<br>3 | 0.97 | 0.97 | 0.90 | 0.96 |
| Model 20 |           | < 100 and >100 | 64  | 41  | 23      | 9      | 0  | 8       | 6 | 14  | 9  | 23  | 0.57 | 1.00 | 0.8<br>2 | 0.75 | 0.77 | 0.59 | 0.74 |
| Model 21 | Dataset-6 | < 10 and >10   | 70  | 45  | 25      | 1      | 1  | 23      | 0 | 23  | 2  | 25  | 1.00 | 0.5  | 0.5<br>2 | 0.71 | 0.98 | 0.69 | 0.96 |
| Model 22 |           | < 30 and >30   | 70  | 45  | 25      | 7      | 0  | 16      | 2 | 18  | 7  | 25  | 0.89 | 1.00 | 0.9<br>1 | 0.94 | 0.94 | 0.83 | 0.92 |
| Model 23 |           | < 50 and >50   | 70  | 45  | 25      | 6      | 4  | 15      | 0 | 15  | 10 | 25  | 1.00 | 0.60 | 0.8<br>8 | 0.77 | 0.88 | 0.69 | 0.84 |
| Model 24 |           | < 100 and >100 | 70  | 45  | 25      | 1<br>2 | 1  | 11      | 1 | 12  | 13 | 25  | 0.92 | 0.92 | 0.9<br>6 | 0.92 | 0.92 | 0.84 | 0.92 |
| Model 25 | combined  | < 10 and >10   | 309 | 200 | 10<br>9 | 5      | 3  | 10<br>1 | 0 | 101 | 8  | 109 | 1.00 | 0.62 | 0.7<br>4 | 0.79 | 0.98 | 0.78 | 0.97 |
| Model 26 |           | < 30 and >30   | 309 | 200 | 10<br>9 | 1<br>2 | 10 | 85      | 2 | 87  | 22 | 109 | 0.98 | 0.54 | 0.7<br>9 | 0.73 | 0.93 | 0.63 | 0.89 |
| Model 27 |           | < 50 and >50   | 309 | 200 | 10<br>9 | 2<br>8 | 8  | 67      | 6 | 73  | 36 | 109 | 0.92 | 0.78 | 0.8<br>6 | 0.84 | 0.90 | 0.71 | 0.87 |

Figure S1: Overall KNIME workflow of classification models.

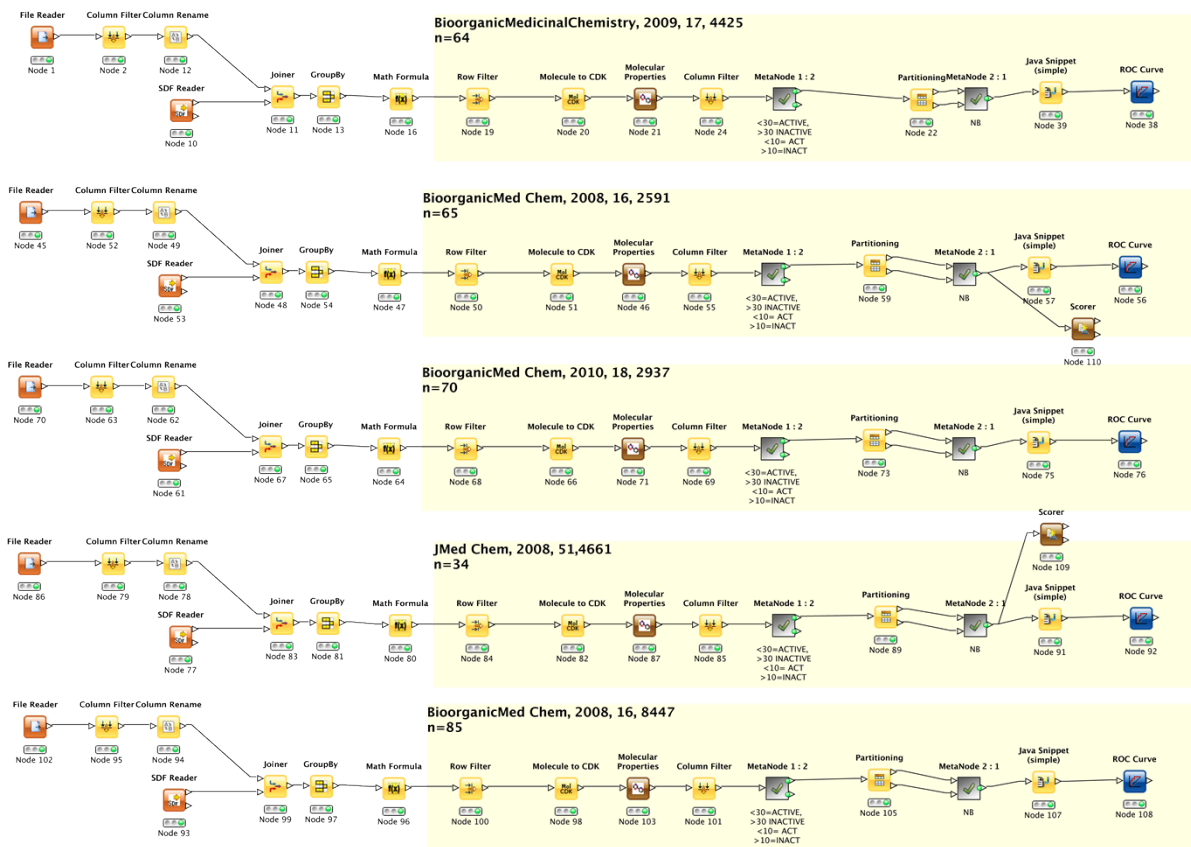

Figure S2: Loading scatter plot for the descriptors

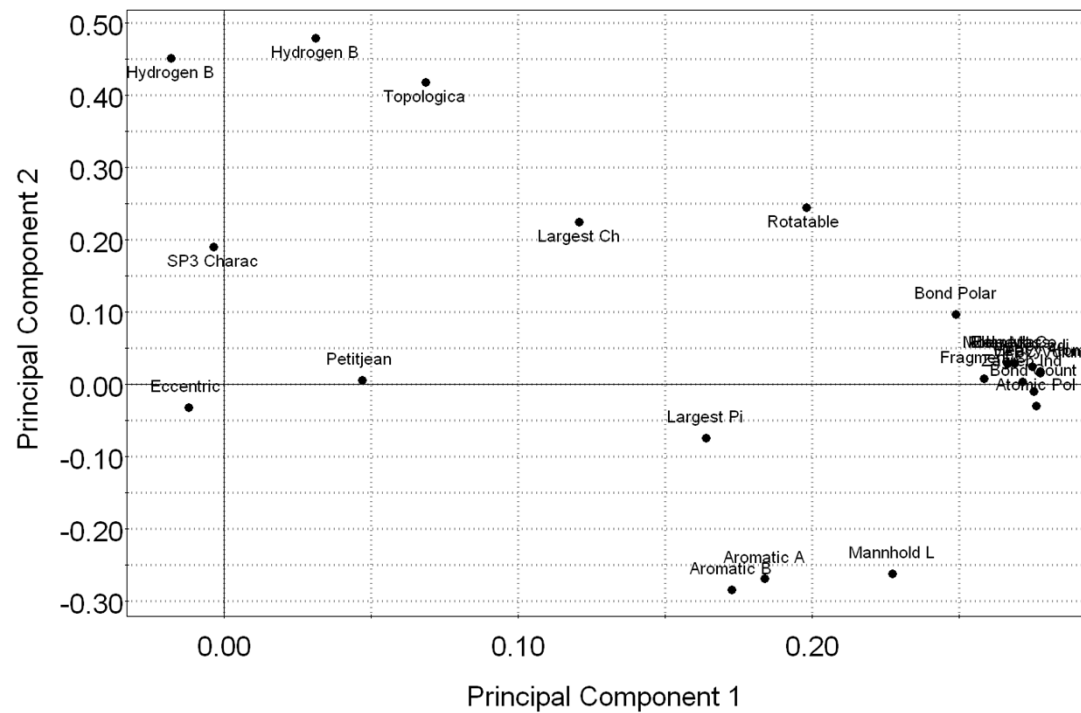

Supplement: c4ra15317k1.pdf [file c4ra15317k1.pdf]
